# Supplementary material for: Lipolysis drives expression of the constitutively active receptor GPR3 to induce adipose thermogenesis
Source: PubMed Central journal article supplement (PMC8238500; doi:10.1016/j.cell.2021.04.037), 2021-06-24
Supplement: mmc1.pdf [file mmc1.pdf]

## **Supplemental information**

### **Lipolysis drives expression of the constitutively active receptor GPR3 to induce adipose thermogenesis**

**Olivia Sveidahl Johansen, Tao Ma, Jakob Bondo Hansen, Lasse Kruse Markussen, Renate Schreiber, Laia Reverte-Salisa, Hua Dong, Dan Ploug Christensen, Wenfei Sun, Thorsten Gnad, Iuliia Karavaeva, Thomas Svava Nielsen, Sander Kooijman, Cheryl Cero, Oksana Dmytriyeva, Yachen Shen, Maria Razzoli, Shannon L. O'Brien, Eline N. Kuipers, Carsten Haagen Nielsen, William Orchard, Nienke Willemsen, Naja Zenius Jespersen, Morten Lundh, Elahu Gosney Sustarsic, Cecilie Mørch Hallgren, Mikkel Frost, Seth McGonigle, Marie Sophie Isidor, Christa Broholm, Oluf Pedersen, Jacob Bo Hansen, Niels Grarup, Torben Hansen, Andreas Kjær, James G. Granneman, M. Madan Babu, Davide Calebiro, Søren Nielsen, Mikael Rydén, Raymond Soccio, Patrick C.N. Rensen, Jonas Thue Treebak, Thue Walter Schwartz, Brice Emanuelli, Alessandro Bartolomucci, Alexander Pfeifer, Rudolf Zechner, Camilla Scheele, Susanne Mandrup, and Zachary Gerhart-Hines**

**Table S1. Relative cold induction of Gs-coupled GPCRs in BAT, Related to Figure 1.**

| Receptor  | TN | 3 hours cold  | 8 hours cold  | 24 hours cold | 3 days cold   | 1 week cold   |
|-----------|----|---------------|---------------|---------------|---------------|---------------|
| Adcyap1r1 | 1  | 0.886         | 0.789         | 1.226         | 1.320         | 1.083         |
| Adora2a   | 1  | 1.218         | 1.367         | 1.475         | 0.677         | 0.676         |
| Adora2b   | 1  | 0.642         | 0.635         | 0.700         | 0.779         | 1.119         |
| Adrb1     | 1  | 1.349         | 1.297         | 1.164         | 1.399         | 0.910         |
| Adrb2     | 1  | 0.279         | 0.316         | 0.173         | 0.125         | 0.137         |
| Adrb3     | 1  | 0.202         | 0.425         | 0.440         | 1.509         | 1.003         |
| Avpr2     | 1  | 1.024         | 0.734         | 1.629         | 0.817         | 2.172         |
| Calcr1    | 1  | 0.617         | 1.063         | 1.537         | 1.089         | 1.598         |
| Crhr1     | 1  | 0.559         | 0.817         | 1.594         | 1.208         | 1.414         |
| Crhr2     | 1  | 0.951         | 1.255         | 2.091         | 1.599         | 2.407         |
| Drd1a     | 1  | 2.673         | 13.384 [****] | 10.043 [***]  | 4.394         | 18.786 [****] |
| Drd5      | 1  | 0.292         | 1.109         | 2.381         | 3.532         | 1.556         |
| Fshr      | 1  | 1.999         | 1.157         | 1.478         | 1.508         | 1.495         |
| Gcgr      | 1  | 1.014         | 1.325         | 1.313         | 0.515         | 1.182         |
| Ghrhr     | 1  | 0.908         | 0.873         | 6.309         | 2.935         | 2.733         |
| Gipr      | 1  | 0.526         | 0.538         | 0.763         | 1.057         | 0.479         |
| Glp1r     | 1  | 1.359         | 1.795         | 1.562         | 1.375         | 1.426         |
| Glp2r     | 1  | 2.905         | 1.897         | 1.654         | 1.175         | 2.377         |
| Gpbar1    | 1  | 1.554         | 0.838         | 0.654         | 1.100         | 0.622         |
| Gpr101    | 1  | 0.301         | 1.456         | 0.254         | 1.710         | 0.541         |
| Gpr119    | 1  | 1.954         | 2.432         | 1.579         | 1.122         | 7.595 [*]     |
| Gpr133    | 1  | 2.170         | 1.409         | 1.853         | 1.921         | 2.820         |
| Gpr26     | 1  | 1.165         | 1.160         | 1.483         | 2.547         | 1.329         |
| Gpr3      | 1  | 30.042 [****] | 63.521 [****] | 67.077 [****] | 52.432 [****] | 87.234 [****] |
| Gpr65     | 1  | 0.756         | 1.030         | 0.639         | 0.780         | 2.103         |
| Htr7      | 1  | 0.675         | 0.846         | 0.604         | 0.898         | 1.070         |
| Lhcgr     | 1  | 0.360         | 0.957         | 5.239         | 4.490         | 1.262         |
| Mc1r      | 1  | 1.134         | 0.843         | 0.772         | 0.281         | 0.532         |
| Mc2r      | 1  | 0.151         | 0.192         | 0.290         | 0.247         | 0.175         |
| Mc3r      | 1  | 1.275         | 1.431         | 1.581         | 1.325         | 1.562         |
| Mc4r      | 1  | 1.597         | 2.215         | 1.234         | 3.078         | 1.497         |
| Mc5r      | 1  | 0.998         | 1.185         | 0.436         | 1.062         | 1.227         |
| Ptgdr     | 1  | 2.598         | 1.458         | 3.189         | 2.545         | 1.350         |
| Ptger2    | 1  | 1.079         | 0.970         | 2.589         | 0.325         | 2.045         |
| Ptger4    | 1  | 0.697         | 0.910         | 0.902         | 0.354         | 0.812         |
| Ptgir     | 1  | 0.685         | 0.984         | 0.737         | 0.731         | 1.350         |
| Pth1r     | 1  | 0.414         | 0.707         | 0.725         | 0.667         | 0.492         |
| Rxfp2     | 1  | 0.821         | 1.584         | 1.191         | 2.346         | 1.014         |
| Sctr      | 1  | 0.649         | 0.265         | 0.113         | 0.252         | 0.252         |
| Taar1     | 1  | 1.360         | 0.886         | 0.840         | 0.807         | 1.313         |
| Taar4     | 1  | 2.854         | 2.207         | 2.455         | 2.444         | 1.569         |
| Tshr      | 1  | 0.690         | 0.687         | 0.878         | 1.508         | 0.787         |
| Vipr1     | 1  | 2.488         | 0.519         | 0.821         | 1.583         | 0.764         |
| Vipr2     | 1  | 0.921         | 0.607         | 0.508         | 0.892         | 0.620         |

**Table S2. Relative cold induction of Gs-coupled GPCRs in scWAT, Related to Figure 1.**

| <b>Receptor</b> | <b>TN</b> | <b>1 week cold</b> |
|-----------------|-----------|--------------------|
| Adcyap1r1       | 1         | 1.12435            |
| Adora2a         | 1         | 1.015275           |
| Adora2b         | 1         | 0.759228           |
| Adrb1           | 1         | 2.319545 [*]       |
| Adrb2           | 1         | 0.490304           |
| Adrb3           | 1         | 0.877347           |
| Avpr2           | 1         | 0.698586           |
| Calcrl          | 1         | 0.74712            |
| Crhr1           | 1         | 1.026174           |
| Crhr2           | 1         | 0.551537           |
| Drd1a           | 1         | 2.073623           |
| Drd5            | 1         | 0.928179           |
| Fshr            | 1         | 0.957577           |
| Gcgr            | 1         | 0.517928           |
| Ghrhr           | 1         | 1.421452           |
| Gipr            | 1         | 0.552729           |
| Glp1r           | 1         | 0.364139           |
| Glp2r           | 1         | 0.593368           |
| Gpbar1          | 1         | 0.706243           |
| Gpr101          | 1         | 0.967332           |
| Gpr119          | 1         | 0.942241           |
| Gpr133          | 1         | 0.636265           |
| Gpr26           | 1         | 0.548419           |
| Gpr3            | 1         | 4.684511 [****]    |
| Gpr65           | 1         | 0.660672           |
| Htr7            | 1         | 1.04161            |
| Lhcgr           | 1         | 1.09412            |
| Mc1r            | 1         | 0.542785           |
| Mc2r            | 1         | 0.570388           |
| Mc3r            | 1         | 0.727088           |
| Mc4r            | 1         | 1.197985           |
| Mc5r            | 1         | 1.57169            |
| Ptgdr           | 1         | 1.083403           |
| Ptger2          | 1         | 0.405265           |
| Ptger4          | 1         | 0.512577           |
| Ptgir           | 1         | 0.742936           |
| Pth1r           | 1         | 0.609481           |
| Rxfp2           | 1         | 1.222464           |
| Sctr            | 1         | 1.02965            |
| Taar1           | 1         | 0.850346           |
| Taar4           | 1         | 0.627048           |
| Tshr            | 1         | 0.691152           |
| Vipr1           | 1         | 0.593946           |
| Vipr2           | 1         | 1.454639           |

**Table S3. List of primers, Related to STAR Methods.**

| <b>Transcript</b> | <b>Forward primer</b>   | <b>Reverse primer</b>  |
|-------------------|-------------------------|------------------------|
| <i>Gpr3</i> (ORF) | ATGTTCTGCTGGTGGGTAG     | GTGAGCCAATGCAGAAGTCA   |
| <i>Gpr3</i> (UTR) | ATCACCTGAGCAACCGAGAA    | AGATGGGGGTGCATTTTACA   |
| <i>36b4</i>       | TCATCCAGCAGGTGTTTGACA   | GGCACCGAGGCAACAGTT     |
| <i>Ucp1</i>       | GGATTGGCCTCTACGACTCA    | TAAGCCGGCTGAGATCTTGT   |
| <i>Bmp8b</i>      | AGCCTGACTTGAACCTGGAA    | ACCCCAAGAGACAGGCTAT    |
| <i>Dio2</i>       | GCTTCCTCTAGATGCCTACAA   | AGTCAAGAAGGTGGCATTTCG  |
| <i>Lpl</i>        | CCCTAAGGACCCCTGAAGAC    | GGCCCGATACAACCAGTCTA   |
| <i>Acadm</i>      | GCCCAGAGAGCTCTAGACGA    | GCGAGCAGAAATGAACTCC    |
| <i>Elovl3</i>     | ATGAATTTCTCACGCGGGTT    | AGCTTACCCAGTACTCCTCCA  |
| <i>Adcy3</i>      | GGAAAAGGACTCTCCTATGGTGG | CTGTCAGTGCCATTGAGCCC   |
| <i>Adrb1</i>      | CTACAACGACCCCAAGTGCT    | GGCACGTAGAAGGAGACGAC   |
| <i>Adrb2</i>      | CAGGAAGTCTGTGTGAGGA     | CTTGGGAGTCAACGCTAAGG   |
| <i>Adrb3</i>      | AGGAAGCTTGCTTGATCCCC    | GCATCCATAGCCGTTGCTTG   |
| <i>Pparg</i>      | AGAAGCTGCATCTCCACCTT    | CCGGCAGTTAAGATCACACC   |
| <i>Ppara</i>      | AATTTGCTGTGGAGATCGGC    | TTAAGCACGTGCACAATCCC   |
| <i>Srebp1</i>     | CTTACCCCTCCACCTCAGA     | TGTCGGGCTCAGAGTCACTA   |
| <i>Lxra</i>       | TCGTGTCCGTGCAGGAGATT    | TCTCCAGAAGCATGACCTCGAT |
| <i>Lxrb</i>       | CCCCACCATTGAGTCTTCC     | CTCCACTCAAGGTGCATGGT   |
| <i>GPR3</i>       | GTCCTGAGCGGTACCATGA     | CCCACGCTGCTTACATTAC    |
| <i>36B4</i>       | TTTGTGTTACCAAGGAGGA     | GTGACTTCACATGGGGCAAT   |
| <i>UCP1</i>       | AAGGCTTGACGGGTCTTTG     | CGATAAGAGCCGACACCAAG   |
| <i>PRDM16</i>     | CGGCAAAGGAGACAGACTTC    | CATCCACGCAGAACTTCTCA   |
| <i>FABP4</i>      | TACTGGGCCAGGAATTTGAC    | TACCAGGACACCCCATCTA    |
| <i>DIO2</i>       | GGAAGAGCTTCTCCTCGAT     | CTGGAGACATGCACCACACT   |
| <i>GLUT4</i>      | AACTGGACGAGCAACTTCATC   | AGGACCGCAAATAGAAGGAAG  |
| <i>NDUFA</i>      | CCGAACACTGTGCACCAATTC   | GGGTCTGTGACATGGGCATT   |
| <i>COX7A1</i>     | CCGCTTTCAGAACCGAGTG     | AGAGGCCAGCGTTTATTGACA  |
| <i>CRLS1</i>      | GCTTGGCCCCAGTTCTGG      | GGCCCAGTTTCGAGCAATAA   |
| <i>GPD2</i>       | GAAGTGGCTGTGCGCTAGAT    | TAGTGCTTCTGCTGCTGGTC   |
| <i>FASN</i>       | AAGGACCTGTCTAGGTTTGATGC | TGGCTTCATAGGTGACTTCCA  |
| <i>ADIPOQ</i>     | CCTGGTGAGAAGGGTGAGAA    | CTCCTTCTGCCTTGGATT     |
